# Supplementary material for: Antibacterial and surface properties of post-light-activated metal-free phthalocyanine-deposited TiO2 nanotube smart surfaces
Source: Royal Society of Chemistry journal article supplement (doi:10.1039/d4dt03192j), 2025-01-01
Supplement: d4dt03192j1.pdf [file d4dt03192j1.pdf]

## Supplementary Data

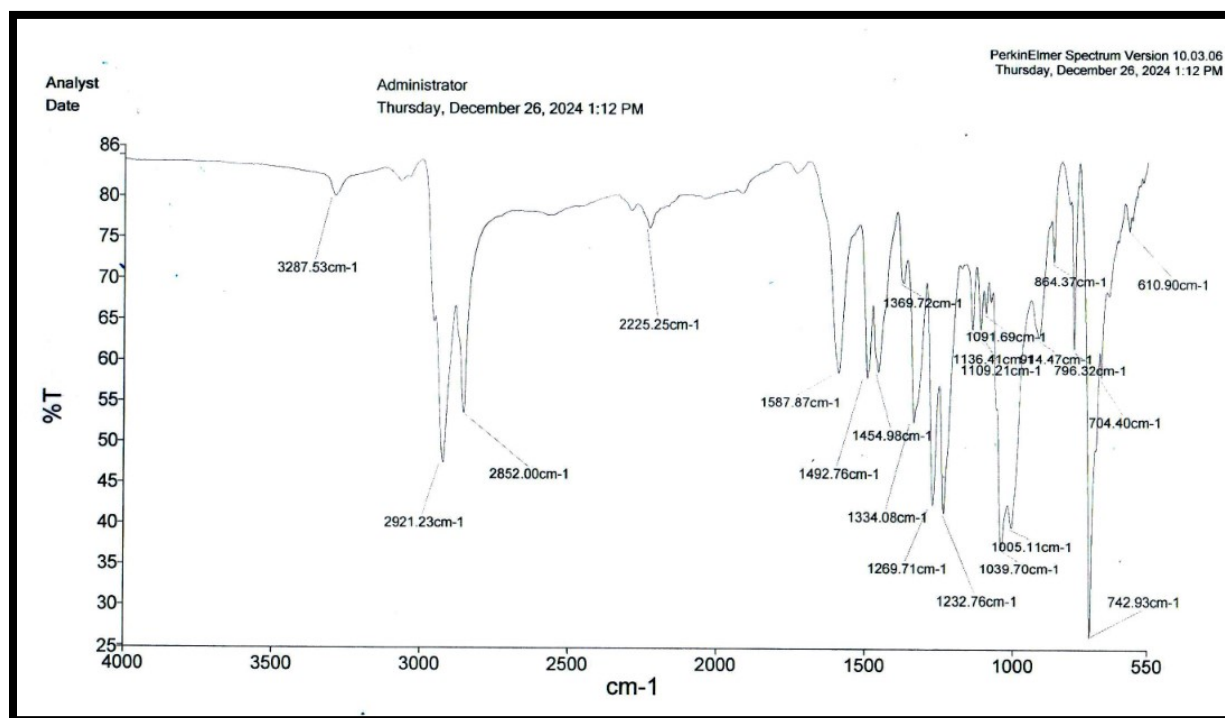

**Supplementary Figure 1.** FT-IR spectra of synthesized 2(3), 9(10), 16(17), 23(24)-Tetrakis-[dec-2-yn-1-yloxy]phthalocyanine ( $H_2Pc$ ).
